# Supplementary material for: Perspectives of homeless service providers on their work, their clients, and the healthcare system
Source: PubMed Central journal article supplement (PMC9135197; doi:10.1371/journal.pone.0268765), 2022-05-26
Supplement: pone.0268765.s001.pdf [file pone.0268765.s001.pdf]

# S1 File. Attitudes Toward Homelessness Inventory (ATHI).

## Attitudes Toward Homelessness Inventory (ATHI)

On the questionnaire, please circle the number that most closely represents your view

1= strongly agree

2=agree

3=unsure but probably agree

4=unsure but probably disagree

5=disagree

6=strongly disagree

- |                                                                                                                           |   |   |   |   |   |   |
|---------------------------------------------------------------------------------------------------------------------------|---|---|---|---|---|---|
| 1. Homeless people had parents who took little interest in them as children                                               | 1 | 2 | 3 | 4 | 5 | 6 |
| 2. Recent government cutbacks in housing assistance for the poor may have made the homeless problem in this country worse | 1 | 2 | 3 | 4 | 5 | 6 |
| 3. The low minimum wage in this country virtually guarantees a large homeless population                                  | 1 | 2 | 3 | 4 | 5 | 6 |
| 4. I would feel comfortable eating a meal with a homeless person                                                          | 1 | 2 | 3 | 4 | 5 | 6 |
| 5. Rehabilitation programs for the homeless are too expensive to operate                                                  | 1 | 2 | 3 | 4 | 5 | 6 |
| 6. There is little that can be done for people in homeless shelters except to see that they are comfortable and well fed  | 1 | 2 | 3 | 4 | 5 | 6 |
| 7. Most circumstances of homelessness in adults can be traced to their emotional experiences in childhood                 | 1 | 2 | 3 | 4 | 5 | 6 |
| 8. Most homeless persons are substance abusers                                                                            | 1 | 2 | 3 | 4 | 5 | 6 |
| 9. Recent government cutbacks in welfare have contributed substantially to the homeless problem in this country           | 1 | 2 | 3 | 4 | 5 | 6 |
| 10. I feel uneasy when I meet homeless people                                                                             | 1 | 2 | 3 | 4 | 5 | 6 |
| 11. A homeless person cannot really be expected to adopt a normal lifestyle                                               | 1 | 2 | 3 | 4 | 5 | 6 |
